# Supplementary material
Source: PubMed Central journal article supplement (PMC5838574)
Supplement: jama-319-807-s001.pdf [file jama-319-807-s001.pdf]

## Supplementary Online Content

Chang S-L, Huang Y-L, Lee M-C, et al. Association of varicose veins with incident venous thromboembolism and peripheral artery disease. *JAMA*. doi:10.1001/jama.2018.0246

### **eAppendix.** Methods, Results, References

**eTable 1.** Diagnosis codes

**eTable 2.** Associations between varicose veins and subsequent risk of deep vein thrombosis, pulmonary embolism and peripheral artery disease by duration of follow-up

**eTable 3.** Incidence rates and hazard ratios for deep vein thrombosis in patients with varicose veins vs. propensity score-matched controls presented overall and by sex and age at diagnosis of varicose veins

**eTable 4.** Incidence rates and hazard ratios for deep vein thrombosis in patients with varicose veins vs. propensity score-matched controls presented overall and by sex and age at diagnosis of varicose veins in analysis restricted to a length of follow-up of at least one year

**eTable 5.** Incidence rates and hazard ratios for pulmonary embolism in patients with varicose veins vs. propensity score-matched controls presented overall and by sex and age at diagnosis of varicose veins

**eTable 6.** Incidence rates and hazard ratios for deep vein thrombosis in patients with varicose veins vs. age-, sex-, calendar year-matched controls presented overall and by sex and age at diagnosis of varicose veins

**eTable 7.** Incidence rates and hazard ratios for deep vein thrombosis in patients with varicose veins vs. age-, sex-, calendar year-matched controls presented overall and by sex and age at diagnosis of varicose veins in analysis restricted to a length of follow-up of at least one year

**eTable 8.** Incidence rates and hazard ratios for pulmonary embolism in patients with varicose veins vs. age-, sex-, calendar year-matched controls presented overall and by sex and age at diagnosis of varicose veins

**eTable 9.** Incidence rates and hazard ratios for peripheral artery disease in patients with varicose veins vs. propensity score-matched controls presented overall and by sex and age at diagnosis of varicose veins

**eTable 10.** Incidence rates and hazard ratios for peripheral artery disease in patients with varicose veins vs. age-, sex-, calendar year-matched controls presented overall and by sex and age at diagnosis of varicose veins

**eFigure.** Sensitivity analysis for the relative risk (RR) of DVT, PE and PAD calculated using inverse probability of treatment weighting (IPTW).

This supplementary material has been provided by the authors to give readers additional information about their work.

# eAppendix

## Methods

### Data Source

The NHI program is a single-payer system with mandatory enrollment, providing comprehensive coverage to all residents of Taiwan. Of the NHI beneficiaries, 98% are Taiwanese residents, who are predominately ethnic Chinese. A computerized database was created from the claims data, comprising registry files of the beneficiaries, hospital admissions, ambulatory care and emergency room visits.

### Validation of a diagnosis of varicose veins

We requested outpatient medical records with ICD-9-CM codes 454.xx in any one of the three outpatient diagnosis code fields between 2000 and 2014 from three branches of Chang-Gung Memorial Hospital. Medical records for a random sample of 239 patients were obtained and reviewed by a dermatologist as part of this external validation. Diagnosis codes were validated using the CEAP classification, a duplex ultrasound examination report, or an operation or treatment report. Of the 239 patients, 39 were excluded due to incomplete or unidentifiable medical records. The validation criterion was met in 196 of the 200 remaining patients. Thus in our validation cohort, code 454 in outpatient records had a positive predictive value of 98%. Among the 196 patients with varicose veins, 12 were classified as C1 (telangiectasias or reticular veins, 6.1%), 81 as C2 (varicose veins, 41.3%), 32 as C3 (edema, 16.3%), 45 as C4 (pigmentation, eczema, lipodermatosclerosis, or atrophie blanche, 22.9%), four as C5 (healed venous ulcer, 2.0%), and 16 as C6 (active venous ulcer, 8.2%). Six patients (3.1%) could not be classified due to insufficient information in their medical records; however, the duplex ultrasound reports and/or operation records confirmed their diagnosis of varicose veins.

### Analysis of the potential effect of unmeasured confounders

We used the methods of Greenland et al.<sup>1</sup> to perform the external adjustment for smoking and estimate the strength of the association between smoking and varicose veins that is required to remove most of the observed associations with DVT, PE and PAD.

A previous meta-analysis revealed that the relative risk in association with current smoking was 1.39 for DVT and 1.38 for PE.<sup>2</sup> Another meta-analyses showed that the odds ratio (relative risks were treated as equivalent to odds ratio) of PAD associated with current smoking was 3.08 in general populations.<sup>3</sup> The prevalence of smoking in control group was estimated to be 21.1%, which was inferred from previous studies of general adult population in Taiwan.<sup>4</sup> In patients with varicose veins, we used hypothesized values with smoking prevalence of 30%, 50%, and 70%, corresponding to an

odds ratio of 1.60, 3.74 and 8.73 for the association between smoking and varicose veins.

Hypothetical scenarios with a relative risk of 5 for the associations of smoking with DVT, PE and PAD were also used in the sensitivity analyses.

## Results

Taking the smoking prevalence of 30% in varicose veins group, the RRs were 5.15 for DVT, 1.68 for PE, and 1.53 for PAD after external adjustment for smoking; taking a smoking prevalence of 70% in the varicose veins group, the adjusted RRs were 4.52 for DVT, 1.48 for PE, and 1.01 for PAD. In the sensitivity analyses, we used a hypothetical scenario with a RR of 5 for the associations between smoking and DVT, PE and PAD. Taking smoking prevalence of 30% in varicose veins group, the externally smoking-adjusted RRs were 4.45 for DVT, 1.45 for PE, and 1.45 for PAD. When taking smoking prevalence of 50% in the varicose veins group, the adjusted RRs were 3.26 for DVT, 1.06 for PE, and 1.06 for PAD. When taking the smoking prevalence of 70% in the varicose veins group, the adjusted RR reduced substantially to 2.58 for DVT, 0.84 for PE, and 0.84 for PAD.

## References

1. Greenland S, Lash TL. Analysis of unmeasured confounders – external adjustment, in *Modern Epidemiology*, 3rd ed. Edited by Rothman KJ, Greenland S, Lash TL. Philadelphia, Lippincott Williams & Wilkins, 2008, pp 348–351.
2. Cheng YJ, Liu ZH, Yao FJ, et al. Current and former smoking and risk for venous thromboembolism: a systematic review and meta-analysis. *PLoS Med*. 2013;10(9):e1001515.
3. Lu L, Mackay DF, Pell JP. Meta-analysis of the association between cigarette smoking and peripheral arterial disease. *Heart*. 2014;100(5):414-23.
4. Chang FC, Hu TW, Lo SY, Yu PT, Chao KY, Hsiao ML. Quit smoking advice from health professionals in Taiwan: the role of funding policy and smoker socioeconomic status. *Tob Control*. 2010;19(1):44-9.

**eTable 1. Diagnosis codes**

| Name                             | ICD-9-CM code                                                                      |
|----------------------------------|------------------------------------------------------------------------------------|
| Deep vein thrombosis             | 451.1 Phlebitis & thrombophlebitis of deep veins of lower extremities              |
|                                  | 451.11 Phlebitis & thrombophlebitis, of deep veins lower extremities, femoral vein |
|                                  | 451.19 Phlebitis & thrombophlebitis, of deep veins of lower extremities, other     |
|                                  | 451.2 Phlebitis & thrombophlebitis, of lower extremities, unspecified              |
|                                  | 451.81 Phlebitis & thrombophlebitis, of other sites, iliac vein                    |
|                                  | 451.89 Phlebitis & thrombophlebitis of other sites                                 |
|                                  | 451.9 Phlebitis & thrombophlebitis, of unspecified site                            |
|                                  | Deep vein thrombosis, not of upper extremity:                                      |
|                                  | 453.2 Other venous embolism & thrombosis, of vena cava                             |
|                                  | 453.4 Acute venous embolism & thrombosis of deep vessels of lower extremity        |
|                                  | 453.41 Venous embolism & thrombosis of deep vessels of proximal lower extremity    |
|                                  | 453.42 Venous embolism & thrombosis of deep vessels of distal lower extremity      |
|                                  | 453.8 Other venous embolism & thrombosis, of other specified veins                 |
|                                  | 453.89 Acute venous embolism & thrombosis of other specified veins                 |
|                                  | 453.9 Other venous embolism & thrombosis, of unspecified site                      |
|                                  | Pulmonary embolism                                                                 |
| 415.12 Septic pulmonary embolism |                                                                                    |
| 415.19 Other                     |                                                                                    |
| Peripheral artery disease        | 440.0x Atherosclerosis of aorta                                                    |
|                                  | 440.2x Atherosclerosis of native arteries of the extremities                       |
|                                  | 440.8x Atherosclerosis of other specified arteries                                 |
|                                  | 440.9x Generalized and unspecified atherosclerosis                                 |

|                                       |                                                                        |
|---------------------------------------|------------------------------------------------------------------------|
|                                       | 443.9x Peripheral vascular disease, unspecified                        |
|                                       | 444.0x Arterial embolism and thrombosis of abdominal aorta             |
|                                       | 444.2x Arterial embolism and thrombosis of arteries of the extremities |
|                                       | 444.8x Arterial embolism and thrombosis of other specified artery      |
|                                       | 447.8x Other specified disorders of arteries and arterioles            |
|                                       | 447.9x Unspecified disorders of arteries and arterioles                |
| Hypertension                          | 401.xx-405.xx                                                          |
| Diabetes                              | 250.xx                                                                 |
| Chronic obstructive pulmonary disease | 490.xx, 491.xx, 492.xx, 493.xx, 494.xx, 495.xx, 496.xx                 |
| Hyperlipidemia                        | 272.xx                                                                 |
| Malignancy                            | 140.xx-208.xx                                                          |
| Atrial fibrillation                   | 427.31                                                                 |
| Heart failure                         | 428.xx                                                                 |
| Ischemic heart disease                | 410.xx-414.xx                                                          |
| Chronic renal insufficiency           | 403.xx, 404.xx, 582.xx, 585.xx-588.xx                                  |
| Stroke                                | 434.0x-434.9x, 436.xx, 430.xx-432.9x                                   |

Abbreviation: ICD-9-CM, International Classification of Diseases, 9th Revision, Clinical Modification.

**eTable 2. Associations between varicose veins and subsequent risk of deep vein thrombosis, pulmonary embolism and peripheral artery disease by duration of follow-up**

| Duration of follow-up, years | Patients with varicose veins |              |              |                                   | Control group matched on age, sex and calendar year |              |              |                                   | Absolute risk difference (95% CI) per 1000 person-years | Patients with varicose veins vs. control group |                                  |
|------------------------------|------------------------------|--------------|--------------|-----------------------------------|-----------------------------------------------------|--------------|--------------|-----------------------------------|---------------------------------------------------------|------------------------------------------------|----------------------------------|
|                              | No. of patients              | No. of cases | Number of PY | Incidence (95% CI) <sup>a,b</sup> | No. of patients                                     | No. of cases | Number of PY | Incidence (95% CI) <sup>a,b</sup> |                                                         | Unadjusted HR (95%CI)                          | Adjusted <sup>c</sup> HR (95%CI) |
| Deep vein thrombosis         |                              |              |              |                                   |                                                     |              |              |                                   |                                                         |                                                |                                  |
| All                          | 212984                       | 10360        | 1581446      | 6.55 (6.42-6.68)                  | 851936                                              | 6942         | 6440345      | 1.08 (1.05-1.10)                  | 5.47(5.34-5.60)                                         | 6.06 (5.88-6.25)                               | 5.39 (5.22-5.56)                 |
| >1                           | 208648                       | 6060         | 1371818      | 4.42 (4.31-4.53)                  | 847026                                              | 5488         | 5591184      | 0.98 (0.96-1.01)                  | 3.44(3.33-3.55)                                         | 4.50 (4.34-4.67)                               | 3.99 (3.84-4.14)                 |
| >2                           | 190590                       | 4941         | 1172684      | 4.21 (4.10-4.33)                  | 774771                                              | 4558         | 4782143      | 0.95 (0.93-0.98)                  | 3.26(3.14-3.38)                                         | 4.42 (4.25-4.60)                               | 3.92 (3.76-3.38)                 |
| >5                           | 144383                       | 2585         | 672578       | 3.84 (3.70-3.99)                  | 588693                                              | 2469         | 2746103      | 0.90 (0.86-0.93)                  | 2.94(2.79-3.09)                                         | 4.28 (4.05-4.52)                               | 3.82 (3.61-4.04)                 |
| Pulmonary embolism           |                              |              |              |                                   |                                                     |              |              |                                   |                                                         |                                                |                                  |
| All                          | 212984                       | 793          | 1639174      | 0.48 (0.45-0.52)                  | 851936                                              | 1521         | 6469344      | 0.24 (0.22-0.25)                  | 0.24(0.20-0.28)                                         | 2.06 (1.89-2.24)                               | 1.75 (1.60-1.91)                 |
| >1                           | 212785                       | 631          | 1426296      | 0.44 (0.41-0.48)                  | 848237                                              | 1278         | 5619429      | 0.23 (0.21-0.24)                  | 0.21(0.17-0.25)                                         | 1.95 (1.77-2.14)                               | 1.68 (1.52-1.85)                 |
| >2                           | 195394                       | 545          | 1222657      | 0.45 (0.41-0.48)                  | 776640                                              | 1108         | 4808825      | 0.2 (0.22-0.2)                    | 0.22(0.18-0.26)                                         | 1.93 (1.75-2.14)                               | 1.6 (1.52-1.87)                  |

**eTable 2. Associations between varicose veins and subsequent risk of deep vein thrombosis, pulmonary embolism and peripheral artery disease by duration of follow-up**

| Duration of follow-up, years | Patients with varicose veins |              |              |                                   | Control group matched on age, sex and calendar year |              |              |                                   | Absolute risk difference (95% CI) per 1000 person-years | Patients with varicose veins vs. control group |                                  |
|------------------------------|------------------------------|--------------|--------------|-----------------------------------|-----------------------------------------------------|--------------|--------------|-----------------------------------|---------------------------------------------------------|------------------------------------------------|----------------------------------|
|                              | No. of patients              | No. of cases | Number of PY | Incidence (95% CI) <sup>a,b</sup> | No. of patients                                     | No. of cases | Number of PY | Incidence (95% CI) <sup>a,b</sup> |                                                         | Unadjusted HR (95%CI)                          | Adjusted <sup>c</sup> HR (95%CI) |
| >5                           | 149935                       | 326          | 706675       | 0.46 (0.41-0.51)                  | 591566                                              | 619          | 2765458      | 0.2 (0.21-0.24)                   | 0.24(0.19-0.29)                                         | 2.06 (1.80-2.36)                               | 1.8 (1.60-2.10)                  |
| Peripheral artery disease    |                              |              |              |                                   |                                                     |              |              |                                   |                                                         |                                                |                                  |
| All                          | 212984                       | 16615        | 1547861      | 10.7 (10.57-10.39)                | 851936                                              | 32725        | 6296328      | 5.2 (5.14-5.20)                   | 5.53(5.36-5.70)                                         | 2.06 (2.02-2.10)                               | 1.7 (1.72-1.79)                  |
| >1                           | 208119                       | 11784        | 1338123      | 8.81 (8.65-8.97)                  | 840180                                              | 24425        | 5451739      | 4.4 (4.42-4.58)                   | 4.33(4.16-4.50)                                         | 1.96 (1.92-2.01)                               | 1.6 (1.66-1.73)                  |
| >2                           | 189028                       | 9620         | 1140068      | 8.44 (8.27-8.61)                  | 765158                                              | 20097        | 4650998      | 4.3 (4.26-4.32)                   | 4.12(3.94-4.30)                                         | 1.95 (1.91-2.00)                               | 1.6 (1.65-1.74)                  |
| >5                           | 141003                       | 4888         | 647852       | 7.54 (7.33-7.76)                  | 574547                                              | 10534        | 2651990      | 3.9 (3.90-4.07)                   | 3.57(3.35-3.79)                                         | 1.90 (1.84-1.96)                               | 1.6 (1.62-1.73)                  |

Abbreviations: CI, confidence interval; HR, hazard ratio; PY, person-years.

<sup>a</sup>per 1,000 person-years

<sup>b</sup>Exact confidence intervals for Poisson distribution

© 2018 American Medical Association. All rights reserved.



<sup>e</sup>Models were adjusted for sex, age, index year, and comorbidities including hypertension, diabetes, chronic obstructive pulmonary disease, hyperlipidemia, malignancy, heart failure, ischemic heart disease, stroke, and chronic renal insufficiency, and the number of outpatient visits in the year before the index date.

**eTable 3. Incidence rates and hazard ratios for deep vein thrombosis in patients with varicose veins vs. propensity score-matched controls** presented overall and by sex and age at diagnosis of varicose veins

|                                       | Patients with varicose veins |              |              |                                   | Control group matched on propensity score |              |              |                                   | Absolute risk difference (95% CI) per 1000 person-years | Hazard ratio (95% CI) |
|---------------------------------------|------------------------------|--------------|--------------|-----------------------------------|-------------------------------------------|--------------|--------------|-----------------------------------|---------------------------------------------------------|-----------------------|
|                                       | No. of patients              | No. of cases | Number of PY | Incidence (95% CI) <sup>a,b</sup> | No. of patients                           | No. of cases | Number of PY | Incidence (95% CI) <sup>a,b</sup> |                                                         |                       |
| Overall                               | 212984                       | 10360        | 1581446      | 6.55 (6.43-6.68)                  | 212984                                    | 1980         | 1605243      | 1.23 (1.18-1.29)                  | 5.32 (5.18-5.46)                                        | 5.30 (5.05-5.56)      |
| Sex <sup>c</sup>                      |                              |              |              |                                   |                                           |              |              |                                   |                                                         |                       |
| Men                                   | 65341                        | 3998         | 486377       | 8.22 (7.97-8.48)                  | 63352                                     | 651          | 489104       | 1.33 (1.23-1.44)                  | 6.89 (6.62-7.16)                                        | 6.11 (5.63-6.64)      |
| Women                                 | 147643                       | 6362         | 1095069      | 5.81 (5.67-5.95)                  | 149632                                    | 1329         | 1116139      | 1.19 (1.13-1.26)                  | 4.62 (4.46-4.78)                                        | 4.88 (4.60-5.18)      |
| Age at diagnosis <sup>d</sup> , years |                              |              |              |                                   |                                           |              |              |                                   |                                                         |                       |
| 20-34                                 | 26797                        | 521          | 199083       | 2.62 (2.40-2.85)                  | 26810                                     | 37           | 200667       | 0.18 (0.13-0.25)                  | 2.44 (2.21-2.67)                                        | 14.17 (10.15-19.78)   |
| 35-44                                 | 32457                        | 977          | 251769       | 3.88 (3.64-4.13)                  | 32235                                     | 124          | 252207       | 0.49 (0.41-0.59)                  | 3.39 (3.13-3.65)                                        | 7.88 (6.54-9.50)      |
| 45-54                                 | 47791                        | 2079         | 360883       | 5.76 (5.52-6.01)                  | 48054                                     | 271          | 367497       | 0.74 (0.65-0.83)                  | 5.02 (4.76-5.28)                                        | 7.80 (6.87-8.85)      |
| 55-64                                 | 43720                        | 2473         | 310383       | 7.97 (7.66-8.29)                  | 44711                                     | 454          | 322251       | 1.41 (1.28-1.54)                  | 6.56 (6.22-6.90)                                        | 5.64 (5.11-6.24)      |
| 65-74                                 | 36714                        | 2514         | 276120       | 9.10 (8.75-9.47)                  | 37901                                     | 670          | 289656       | 2.31 (2.14-2.50)                  | 6.79 (6.39-7.19)                                        | 3.93 (3.61-4.28)      |
| ≥75                                   | 25505                        | 1796         | 183208       | 9.80 (9.35-10.27)                 | 23273                                     | 424          | 172964       | 2.45 (2.22-2.70)                  | 7.35 (6.84-7.86)                                        | 3.96 (3.56-4.40)      |

Abbreviations: CI, confidence interval; PY, person-years.

<sup>a</sup>per 1,000 person-years

<sup>b</sup>Exact confidence intervals for Poisson distribution

<sup>c</sup>Interaction between sex and varicose veins, p<0.001

<sup>d</sup>Interaction between age and varicose veins, p<0.001

© 2018 American Medical Association. All rights reserved.

**eTable 4. Incidence rates and hazard ratios for deep vein thrombosis in patients with varicose veins vs. propensity score-matched controls presented overall and by sex and age at diagnosis of varicose veins in analysis restricted to a length of follow-up of at least one year**

|                                       | Patients with varicose veins |              |              |                                   | Control group matched on propensity score |              |              |                                   | Absolute risk difference (95% CI) per 1000 person-years | Hazard ratio (95% CI) |
|---------------------------------------|------------------------------|--------------|--------------|-----------------------------------|-------------------------------------------|--------------|--------------|-----------------------------------|---------------------------------------------------------|-----------------------|
|                                       | No. of patients              | No. of cases | Number of PY | Incidence (95% CI) <sup>a,b</sup> | No. of patients                           | No. of cases | Number of PY | Incidence (95% CI) <sup>a,b</sup> |                                                         |                       |
| Overall                               | 208648                       | 6060         | 1371818      | 4.42 (4.31-4.53)                  | 211403                                    | 1545         | 1393182      | 1.11 (1.05-1.17)                  | 3.31(3.19-3.43)                                         | 3.98(3.77-4.21)       |
| Sex <sup>c</sup>                      |                              |              |              |                                   |                                           |              |              |                                   |                                                         |                       |
| Men                                   | 63594                        | 2263         | 422405       | 5.36 (5.14-5.58)                  | 62920                                     | 495          | 488923       | 1.16 (1.06-1.27)                  | 4.20(3.96-4.44)                                         | 4.60(4.17-5.70)       |
| Women                                 | 145054                       | 3797         | 949413       | 4.00 (3.87-4.13)                  | 148483                                    | 1050         | 1115662      | 1.09 (1.02-1.15)                  | 2.91(2.77-3.05)                                         | 3.69(3.44-3.95)       |
| Age at diagnosis <sup>d</sup> , years |                              |              |              |                                   |                                           |              |              |                                   |                                                         |                       |
| 20-34                                 | 26546                        | 274          | 172476       | 1.59 (1.41-1.79)                  | 26760                                     | 31           | 173884       | 0.18 (0.12-0.25)                  | 1.41 (1.21-1.61)                                        | 8.91(6.15-12.92)      |
| 35-44                                 | 32032                        | 556          | 219646       | 2.53 (2.33-2.75)                  | 32093                                     | 101          | 220055       | 0.46 (0.37-0.56)                  | 2.07 (1.85-2.29)                                        | 5.52(4.46-6.82)       |
| 45-54                                 | 46943                        | 1239         | 313760       | 3.95 (3.73-4.18)                  | 47745                                     | 221          | 319627       | 0.69 (0.60-0.79)                  | 3.26 (3.03-3.49)                                        | 5.71(4.95-6.59)       |
| 55-64                                 | 42681                        | 1441         | 267474       | 5.39 (5.11-5.67)                  | 44319                                     | 348          | 277770       | 1.25 (1.12-1.39)                  | 4.14 (3.84-4.44)                                        | 4.30(3.83-4.83)       |
| 65-74                                 | 35739                        | 1548         | 240150       | 6.45 (6.13-6.78)                  | 37463                                     | 533          | 251999       | 2.12 (1.94-2.30)                  | 4.33 (3.97-4.69)                                        | 3.05(2.76-3.36)       |
| ≥75                                   | 24707                        | 1002         | 158311       | 6.33 (5.94-6.73)                  | 23023                                     | 311          | 149848       | 2.08 (1.85-2.32)                  | 4.25 (3.81-4.69)                                        | 3.04(2.67-3.45)       |

Abbreviations: CI, confidence interval; PY, person-years.

<sup>a</sup>per 1,000 person-years

<sup>b</sup>Exact confidence intervals for Poisson distribution

<sup>c</sup>Interaction between sex and varicose veins, p<0.001

<sup>d</sup>Interaction between age and varicose veins, p<0.001

© 2018 American Medical Association. All rights reserved.

**eTable 5. Incidence rates and hazard ratios for pulmonary embolism in patients with varicose veins vs. propensity score-matched controls** presented overall and by sex and age at diagnosis of varicose veins

|                                       | Patients with varicose veins |              |              |                                   | Control group matched on propensity score |              |              |                                   | Absolute risk difference (95% CI) per 1000 person-years | Hazard ratio (95% CI) |
|---------------------------------------|------------------------------|--------------|--------------|-----------------------------------|-------------------------------------------|--------------|--------------|-----------------------------------|---------------------------------------------------------|-----------------------|
|                                       | No. of patients              | No. of cases | Number of PY | Incidence (95% CI) <sup>a,b</sup> | No. of patients                           | No. of cases | Number of PY | Incidence (95% CI) <sup>a,b</sup> |                                                         |                       |
| Overall                               | 212984                       | 793          | 1639174      | 0.48 (0.45-0.52)                  | 212984                                    | 451          | 1613354      | 0.28 (0.25-0.31)                  | 0.20(0.16-0.24)                                         | 1.73 (1.54-1.94)      |
| Sex <sup>c</sup>                      |                              |              |              |                                   |                                           |              |              |                                   |                                                         |                       |
| Men                                   | 65341                        | 298          | 509210       | 0.59 (0.52-0.66)                  | 63352                                     | 155          | 491919       | 0.32 (0.27-0.37)                  | 0.27(0.19-0.35)                                         | 1.86 (1.53-2.26)      |
| Women                                 | 147643                       | 495          | 1129961      | 0.44 (0.40-0.48)                  | 149632                                    | 296          | 1121435      | 0.26 (0.23-0.30)                  | 0.18(0.13-0.23)                                         | 1.66 (1.44-1.92)      |
| Age at diagnosis <sup>d</sup> , years |                              |              |              |                                   |                                           |              |              |                                   |                                                         |                       |
| 20-34                                 | 26797                        | 18           | 202145       | 0.09 (0.05-0.14)                  | 26810                                     | 7            | 200774       | 0.03 (0.01-0.07)                  | 0.06(0.01-0.11)                                         | 2.56 (1.07-6.12)      |
| 35-44                                 | 32457                        | 49           | 257551       | 0.19 (0.14-0.25)                  | 32235                                     | 20           | 252721       | 0.08 (0.05-0.12)                  | 0.11(0.05-0.17)                                         | 2.40 (1.43-4.04)      |
| 45-54                                 | 47791                        | 107          | 372794       | 0.29 (0.24-0.35)                  | 48054                                     | 59           | 368539       | 0.16 (0.12-0.21)                  | 0.13(0.06-0.20)                                         | 1.79 (1.31-2.47)      |
| 55-64                                 | 43720                        | 153          | 324057       | 0.47 (0.40-0.55)                  | 44711                                     | 96           | 324196       | 0.30 (0.24-0.36)                  | 0.17(0.07-0.27)                                         | 1.59 (1.23-2.05)      |
| 65-74                                 | 36714                        | 258          | 289906       | 0.89 (0.78-1.01)                  | 37901                                     | 151          | 292525       | 0.52 (0.44-0.61)                  | 0.37(0.23-0.51)                                         | 1.72 (1.41-2.11)      |
| ≥75                                   | 25505                        | 208          | 192721       | 1.08 (0.94-1.24)                  | 23273                                     | 118          | 174599       | 0.68 (0.56-0.81)                  | 0.40(0.21-0.59)                                         | 1.60 (1.27-2.00)      |

Abbreviations: CI, confidence interval; PY, person-years.

<sup>a</sup>per 1,000 person-years

<sup>b</sup>Exact confidence intervals for Poisson distribution

<sup>c</sup>Interaction between sex and varicose veins, p=0.36

<sup>d</sup>Interaction between age and varicose veins, p=0.62

**eTable 6. Incidence rates and hazard ratios for deep vein thrombosis in patients with varicose veins vs. age-, sex-, calendar year-matched controls** presented overall and by sex and age at diagnosis of varicose veins

|                                       | Patients with varicose veins |              |              |                                   | Control group matched on age, sex and calendar year |              |              |                                   | Absolute risk difference (95% CI) per 1000 person-years | Patients with varicose veins vs. control group |                                  |
|---------------------------------------|------------------------------|--------------|--------------|-----------------------------------|-----------------------------------------------------|--------------|--------------|-----------------------------------|---------------------------------------------------------|------------------------------------------------|----------------------------------|
|                                       | No. of patients              | No. of cases | Number of PY | Incidence (95% CI) <sup>a,b</sup> | No. of patients                                     | No. of cases | Number of PY | Incidence (95% CI) <sup>a,b</sup> |                                                         | Unadjusted HR (95%CI)                          | Adjusted <sup>c</sup> HR (95%CI) |
| Overall                               | 212984                       | 10360        | 1581446      | 6.55 (6.42-6.68)                  | 851936                                              | 6942         | 6440345      | 1.08 (1.05-1.10)                  | 5.47(5.34-5.60)                                         | 6.06 (5.88-6.25)                               | 5.39 (5.22-5.56)                 |
| Sex <sup>d</sup>                      |                              |              |              |                                   |                                                     |              |              |                                   |                                                         |                                                |                                  |
| Men                                   | 65341                        | 3998         | 486377       | 8.22 (7.97-8.47)                  | 261364                                              | 2137         | 2011187      | 1.06 (1.02-1.11)                  | 7.16(6.90-7.42)                                         | 7.68 (7.29-8.10)                               | 6.50 (6.16-6.86)                 |
| Women                                 | 147643                       | 6362         | 1095069      | 5.81 (5.67-5.95)                  | 590572                                              | 4805         | 4429158      | 1.08 (1.05-1.12)                  | 4.73(4.58-4.88)                                         | 5.35 (5.15-5.55)                               | 4.88 (4.70-5.07)                 |
| Age at diagnosis <sup>e</sup> , years |                              |              |              |                                   |                                                     |              |              |                                   |                                                         |                                                |                                  |
| 20-34                                 | 26797                        | 521          | 199083       | 2.62 (2.39-2.84)                  | 10704                                               | 150          | 803266       | 0.19 (0.16-0.22)                  | 2.43(2.20-2.66)                                         | 13.93 (11.66-16.77)                            | 12.86 (10.67-15.49)              |
| 35-44                                 | 32457                        | 977          | 251769       | 3.88 (3.64-4.12)                  | 129983                                              | 391          | 1018306      | 0.38 (0.35-0.42)                  | 3.50(3.25-3.75)                                         | 10.09 (8.98-11.35)                             | 8.86 (7.85-9.99)                 |
| 45-54                                 | 47791                        | 2079         | 360883       | 5.76 (5.51-6.01)                  | 191572                                              | 1016         | 1469880      | 0.69 (0.65-0.73)                  | 5.07(4.82-5.32)                                         | 8.32 (7.71-8.96)                               | 7.55 (6.99-8.15)                 |
| 55-64                                 | 43720                        | 2473         | 310383       | 7.97 (7.65-8.28)                  | 174503                                              | 1659         | 1259519      | 1.32 (1.25-1.38)                  | 6.65(6.33-6.97)                                         | 6.04 (5.67-6.43)                               | 5.63 (5.29-6.00)                 |
| 65-74                                 | 36714                        | 2514         | 276120       | 9.10 (8.75-9.46)                  | 146616                                              | 2304         | 1128854      | 2.04 (1.96-2.12)                  | 7.06(6.69-7.43)                                         | 4.45 (4.20-4.70)                               | 4.06 (3.83-4.30)                 |
| ≥75                                   | 25505                        | 1796         | 183208       | 9.80 (9.35-10.26)                 | 102188                                              | 1422         | 760519       | 1.87 (1.77-1.97)                  | 7.93(7.47-8.39)                                         | 5.20 (4.85-5.57)                               | 4.09 (3.80-4.39)                 |

Abbreviations: CI, confidence interval; HR, hazard ratio; PY, person-years.

<sup>a</sup>per 1,000 person-years

<sup>b</sup>Exact confidence intervals for Poisson distribution

<sup>c</sup>Models were adjusted for sex, age, index year, and comorbidities including hypertension, diabetes, chronic obstructive pulmonary disease, hyperlipidemia, malignancy, heart failure, ischemic heart disease, stroke, and chronic renal insufficiency, and the number of outpatient visits in the year before the index date.

<sup>d</sup>Interaction between sex and varicose veins, p<0.001

<sup>e</sup>Interaction between age and varicose veins, p<0.001

© 2018 American Medical Association. All rights reserved.

**eTable 7. Incidence rates and hazard ratios for deep vein thrombosis in patients with varicose veins vs. age-, sex-, calendar year-matched controls presented overall and by sex and age at diagnosis of varicose veins in analysis restricted to a length of follow-up of at least one year**

|                                       | Patients with varicose veins |              |              |                                   | Control group matched on age, sex and calendar year |              |              |                                   | Absolute risk difference (95% CI) per 1000 person-years | Patients with varicose veins vs. control group |                                  |
|---------------------------------------|------------------------------|--------------|--------------|-----------------------------------|-----------------------------------------------------|--------------|--------------|-----------------------------------|---------------------------------------------------------|------------------------------------------------|----------------------------------|
|                                       | No. of patients              | No. of cases | Number of PY | Incidence (95% CI) <sup>a,b</sup> | No. of patients                                     | No. of cases | Number of PY | Incidence (95% CI) <sup>a,b</sup> |                                                         | Unadjusted HR (95%CI)                          | Adjusted <sup>c</sup> HR (95%CI) |
| Overall                               | 208648                       | 6060         | 1371818      | 4.42 (4.31-4.53)                  | 847026                                              | 5488         | 5591184      | 0.98 (0.96-1.01)                  | 3.44(3.33-3.55)                                         | 4.50 (4.34-4.67)                               | 3.99 (3.84-4.14)                 |
| Sex <sup>d</sup>                      |                              |              |              |                                   |                                                     |              |              |                                   |                                                         |                                                |                                  |
| Men                                   | 63594                        | 2263         | 422405       | 5.36 (5.14-5.58)                  | 260125                                              | 1669         | 1750514      | 0.95 (0.91-1.00)                  | 4.41(4.18-4.64)                                         | 5.61 (5.26-5.97)                               | 4.71 (4.42-5.03)                 |
| Women                                 | 145054                       | 3797         | 949413       | 4.00 (3.87-4.13)                  | 586901                                              | 3819         | 3840669      | 0.99 (0.96-1.03)                  | 3.01(2.88-3.14)                                         | 4.02 (3.85-4.21)                               | 3.66 (3.49-3.83)                 |
| Age at diagnosis <sup>e</sup> , years |                              |              |              |                                   |                                                     |              |              |                                   |                                                         |                                                |                                  |
| 20-34                                 | 26546                        | 274          | 172476       | 1.59 (1.40-1.78)                  | 106918                                              | 127          | 696268       | 0.18 (0.15-0.21)                  | 1.41(1.22-1.60)                                         | 8.71 (7.08-10.75)                              | 7.92 (6.37-9.84)                 |
| 35-44                                 | 32032                        | 556          | 219646       | 2.53 (2.32-2.74)                  | 129549                                              | 328          | 888568       | 0.37 (0.33-0.41)                  | 2.16(1.95-2.37)                                         | 6.86 (5.98-7.86)                               | 6.03 (5.24-6.94)                 |
| 45-54                                 | 46943                        | 1239         | 313760       | 3.95 (3.73-4.17)                  | 190589                                              | 845          | 1278859      | 0.66 (0.62-0.71)                  | 3.29(3.07-3.51)                                         | 5.98 (5.48-6.52)                               | 5.43 (4.96-5.94)                 |
| 55-64                                 | 42681                        | 1441         | 267474       | 5.39 (5.11-5.67)                  | 173249                                              | 1343         | 1085730      | 1.24 (1.17-1.30)                  | 4.15(3.86-4.44)                                         | 4.36 (4.04-4.69)                               | 4.07 (3.78-4.39)                 |
| 65-74                                 | 35739                        | 1548         | 240150       | 6.45 (6.12-6.77)                  | 145275                                              | 1806         | 982998       | 1.84 (1.75-1.92)                  | 4.61(4.28-4.94)                                         | 3.51 (3.28-3.75)                               | 3.18 (2.97-3.41)                 |
| ≥75                                   | 24707                        | 1002         | 158311       | 6.33 (5.94-6.72)                  | 101446                                              | 1039         | 658761       | 1.58 (1.48-1.67)                  | 4.75(4.35-5.15)                                         | 4.00 (3.67-4.36)                               | 3.13 (2.86-3.42)                 |

Abbreviations: CI, confidence interval; HR, hazard ratio; PY, person-years.

<sup>a</sup>per 1,000 person-years

<sup>b</sup>Exact confidence intervals for Poisson distribution

<sup>c</sup>Models were adjusted for sex, age, index year, and comorbidities including hypertension, diabetes, chronic obstructive pulmonary disease, hyperlipidemia, malignancy, heart failure, ischemic heart disease, stroke, and chronic renal insufficiency, and the number of outpatient visits in the year before the index date.

<sup>d</sup>Interaction between sex and varicose veins, p<0.001

<sup>e</sup>Interaction between age and varicose veins, p<0.001

© 2018 American Medical Association. All rights reserved.

**eTable 8. Incidence rates and hazard ratios for pulmonary embolism in patients with varicose veins vs. age-, sex-, calendar year-matched controls** presented overall and by sex and age at diagnosis of varicose veins

|                                       | Patients with varicose veins |              |              |                                   | Control group matched on age, sex and calendar year |              |              |                                   | Absolute risk difference (95% CI) per 1000 person-years | Patients with varicose veins vs. control group |                                  |
|---------------------------------------|------------------------------|--------------|--------------|-----------------------------------|-----------------------------------------------------|--------------|--------------|-----------------------------------|---------------------------------------------------------|------------------------------------------------|----------------------------------|
|                                       | No. of patients              | No. of cases | Number of PY | Incidence (95% CI) <sup>a,b</sup> | No. of patients                                     | No. of cases | Number of PY | Incidence (95% CI) <sup>a,b</sup> |                                                         | Unadjusted HR (95%CI)                          | Adjusted <sup>c</sup> HR (95%CI) |
| Overall                               | 212984                       | 793          | 1639174      | 0.48 (0.45-0.52)                  | 851936                                              | 1521         | 6469344      | 0.24 (0.22-0.25)                  | 0.24(0.20-0.28)                                         | 2.06 (1.89-2.24)                               | 1.75 (1.60-1.91)                 |
| Sex <sup>d</sup>                      |                              |              |              |                                   |                                                     |              |              |                                   |                                                         |                                                |                                  |
| Men                                   | 65341                        | 298          | 509210       | 0.59 (0.52-0.65)                  | 261364                                              | 527          | 2020381      | 0.26 (0.24-0.28)                  | 0.33(0.26-0.40)                                         | 2.25 (1.95-2.59)                               | 1.79 (1.55-2.07)                 |
| Women                                 | 147643                       | 495          | 1129964      | 0.44 (0.40-0.48)                  | 590572                                              | 994          | 4448963      | 0.22 (0.21-0.24)                  | 0.22(0.18-0.26)                                         | 1.96 (1.76-2.18)                               | 1.73 (1.55-1.93)                 |
| Age at diagnosis <sup>e</sup> , years |                              |              |              |                                   |                                                     |              |              |                                   |                                                         |                                                |                                  |
| 20-34                                 | 26797                        | 18           | 202145       | 0.09 (0.05-0.13)                  | 10704                                               | 28           | 803816       | 0.03 (0.02-0.05)                  | 0.06 (0.02-0.10)                                        | 2.56 (1.41-4.62)                               | 2.45 (1.33-4.54)                 |
| 35-44                                 | 32457                        | 49           | 257551       | 0.19 (0.14-0.24)                  | 129983                                              | 74           | 1019936      | 0.07 (0.06-0.09)                  | 0.12 (0.06-0.18)                                        | 2.62 (1.83-3.76)                               | 2.17 (1.49-3.14)                 |
| 45-54                                 | 47791                        | 107          | 372794       | 0.29 (0.23-0.34)                  | 191572                                              | 176          | 1474229      | 0.12 (0.10-0.14)                  | 0.17 (0.11-0.23)                                        | 2.41 (1.89-3.06)                               | 2.13 (1.67-2.72)                 |
| 55-64                                 | 43720                        | 153          | 324057       | 0.47 (0.40-0.55)                  | 174503                                              | 320          | 1266495      | 0.25 (0.22-0.28)                  | 0.22 (0.14-0.30)                                        | 1.87 (1.54-2.26)                               | 1.65 (1.36-2.00)                 |
| 65-74                                 | 36714                        | 258          | 289906       | 0.89 (0.78-1.00)                  | 146616                                              | 520          | 1138764      | 0.46 (0.42-0.50)                  | 0.43 (0.31-0.55)                                        | 1.95 (1.68-2.26)                               | 1.75 (1.51-2.04)                 |
| ≥75                                   | 25505                        | 208          | 192721       | 1.08 (0.93-1.23)                  | 102188                                              | 403          | 766104       | 0.53 (0.47-0.58)                  | 0.55 (0.39-0.71)                                        | 2.05 (1.74-2.43)                               | 1.60 (1.35-1.90)                 |

Abbreviations: CI, confidence interval; HR, hazard ratio; PY, person-years.

<sup>a</sup>per 1,000 person-years

<sup>b</sup>Exact confidence intervals for Poisson distribution

<sup>c</sup>Models were adjusted for sex, age, index year, and comorbidities including hypertension, diabetes, chronic obstructive pulmonary disease, hyperlipidemia, malignancy, heart failure, ischemic heart disease, stroke, and chronic renal insufficiency, and the number of outpatient visits in the year before the index date.

<sup>d</sup>Interaction between sex and varicose veins, p=0.14

<sup>e</sup>Interaction between age and varicose veins, p=0.38

© 2018 American Medical Association. All rights reserved.

**eTable 9. Incidence rates and hazard ratios for peripheral artery disease in patients with varicose veins vs. propensity score-matched controls** presented overall and by sex and age at diagnosis of varicose veins

|                                       | Patients with varicose veins |              |              |                                   | Control group matched on propensity score |              |              |                                   | Absolute risk difference (95% CI) per 1000 person-years | Hazard ratio (95% CI) |
|---------------------------------------|------------------------------|--------------|--------------|-----------------------------------|-------------------------------------------|--------------|--------------|-----------------------------------|---------------------------------------------------------|-----------------------|
|                                       | No. of patients              | No. of cases | Number of PY | Incidence (95% CI) <sup>a,b</sup> | No. of patients                           | No. of cases | Number of PY | Incidence (95% CI) <sup>a,b</sup> |                                                         |                       |
| Overall                               | 212984                       | 16615        | 1547861      | 10.73 (10.57-10.90)               | 212984                                    | 9709         | 1561421      | 6.22 (6.09-6.34)                  | 4.51(4.31-4.71)                                         | 1.7<br>2 (1.68-1.77)  |
| Sex <sup>c</sup>                      |                              |              |              |                                   |                                           |              |              |                                   |                                                         |                       |
| Men                                   | 65341                        | 6767         | 470235       | 14.39 (14.05-14.74)               | 63352                                     | 3511         | 472271       | 7.43 (7.19-7.68)                  | 6.96(6.54-7.38)                                         | 1.9<br>2 (1.84-2.00)  |
| Women                                 | 147643                       | 9848         | 1077626      | 9.14 (8.96-9.32)                  | 149632                                    | 6198         | 1089150      | 5.69 (5.55-5.83)                  | 3.45(3.22-3.68)                                         | 1.6<br>1 (1.56-1.66)  |
| Age at diagnosis <sup>d</sup> , years |                              |              |              |                                   |                                           |              |              |                                   |                                                         |                       |
| 20-34                                 | 26797                        | 359          | 200197       | 1.79 (1.61-1.99)                  | 26810                                     | 119          | 200188       | 0.59 (0.49-0.71)                  | 1.20(0.99-1.41)                                         | 3.0<br>2 (2.45-3.71)  |
| 35-44                                 | 32457                        | 1051         | 251975       | 4.17 (3.92-4.43)                  | 32235                                     | 479          | 250350       | 1.91 (1.75-2.09)                  | 2.26(1.96-2.56)                                         | 2.1<br>8 (1.96-2.43)  |
| 45-54                                 | 47791                        | 2703         | 358523       | 7.54 (7.26-7.83)                  | 48054                                     | 1504         | 360713       | 4.17 (3.96-4.39)                  | 3.37(3.02-3.72)                                         | 1.8<br>1 (1.70-1.93)  |
| 55-64                                 | 43720                        | 3878         | 303552       | 12.78 (12.38-13.18)               | 44711                                     | 2410         | 311424       | 7.74 (7.43-8.05)                  | 5.04(4.53-5.55)                                         | 1.6 (1.57-1.74)       |



|       |       |      |        |                     |       |      |        |                     |                      |          |                  |
|-------|-------|------|--------|---------------------|-------|------|--------|---------------------|----------------------|----------|------------------|
| 65-74 | 36714 | 4815 | 262792 | 18.32 (17.81-18.85) | 37901 | 3087 | 275820 | 11.19 (10.80-11.59) | 7.13(6.48-7.78)      | 1.6<br>3 | 5<br>(1.56-1.71) |
| ≥75   | 25505 | 3809 | 170821 | 22.30 (21.60-23.02) | 23273 | 2110 | 162925 | 12.95 (12.40-13.52) | 9.35(8.45-10.25<br>) | 1.7<br>0 | (1.61-1.79)      |

Abbreviations: CI, confidence interval; PY, person-years.

<sup>a</sup>per 1,000 person-years

<sup>b</sup>Exact confidence intervals for Poisson distribution

<sup>c</sup>Interaction between sex and varicose veins, p<0.001

<sup>d</sup>Interaction between age and varicose veins, p<0.001

**eTable 10. Incidence rates and hazard ratios for peripheral artery disease in patients with varicose veins vs. age-, sex-, calendar year-matched controls presented overall and by sex and age at diagnosis of varicose veins**

|                                       | Patients with varicose veins |              |              |                                   | Control group matched on age, sex and calendar year |              |              |                                   | Absolute risk difference (95% CI) per 1000 person-years | Patients with varicose veins vs. control group |                                  |
|---------------------------------------|------------------------------|--------------|--------------|-----------------------------------|-----------------------------------------------------|--------------|--------------|-----------------------------------|---------------------------------------------------------|------------------------------------------------|----------------------------------|
|                                       | (n=212984)                   |              |              |                                   | (n=851936)                                          |              |              |                                   |                                                         | Unadjusted HR (95%CI)                          | Adjusted <sup>c</sup> HR (95%CI) |
|                                       | No. of patients              | No. of cases | Number of PY | Incidence (95% CI) <sup>a,b</sup> | No. of patients                                     | No. of cases | Number of PY | Incidence (95% CI) <sup>a,b</sup> |                                                         |                                                |                                  |
| Overall                               | 212984                       | 16615        | 1547861      | 10.73 (10.57-10.90)               | 851936                                              | 32725        | 6296328      | 5.20 (5.14-5.25)                  | 5.53(5.36-5.70)                                         | 2.06 (2.02-2.10)                               | 1.76 (1.72-1.79)                 |
| Sex <sup>d</sup>                      |                              |              |              |                                   |                                                     |              |              |                                   |                                                         |                                                |                                  |
| Men                                   | 65341                        | 6767         | 470235       | 14.39 (14.05-14.73)               | 261364                                              | 11361        | 1958174      | 5.80 (5.70-5.91)                  | 8.59(8.23-8.95)                                         | 2.46 (2.39-2.54)                               | 1.95 (1.89-2.01)                 |
| Women                                 | 147643                       | 9848         | 1077626      | 9.14 (8.96-9.32)                  | 590572                                              | 21364        | 4338154      | 4.92 (4.86-4.99)                  | 4.22(4.03-4.41)                                         | 1.85 (1.81-1.90)                               | 1.64 (1.60-1.68)                 |
| Age at diagnosis <sup>e</sup> , years |                              |              |              |                                   |                                                     |              |              |                                   |                                                         |                                                |                                  |
| 20-34                                 | 26797                        | 359          | 200197       | 1.79 (1.61-1.98)                  | 10704                                               | 408          | 802029       | 0.51 (0.46-0.56)                  | 1.28(1.09-1.47)                                         | 3.52 (3.06-4.06)                               | 2.90 (2.51-3.56)                 |
| 35-44                                 | 32457                        | 1051         | 251975       | 4.17 (3.92-4.42)                  | 129983                                              | 1448         | 1013074      | 1.43 (1.36-1.50)                  | 2.74(2.48-3.00)                                         | 2.92 (2.70-3.16)                               | 2.41 (2.23-2.62)                 |
| 45-54                                 | 47791                        | 2703         | 358523       | 7.54 (7.26-7.82)                  | 191572                                              | 5142         | 1448043      | 3.55 (3.45-3.65)                  | 3.99(3.69-4.29)                                         | 2.12 (2.03-2.22)                               | 1.84 (1.76-1.93)                 |
| 55-64                                 | 43720                        | 3878         | 303552       | 12.78 (12.37-13.18)               | 174503                                              | 8334         | 1223119      | 6.81 (6.67-6.96)                  | 5.97(5.54-6.40)                                         | 1.87 (1.80-1.95)                               | 1.69 (1.63-1.76)                 |
| 65-74                                 | 36714                        | 4815         | 262792       | 18.32 (17.80-18.84)               | 146616                                              | 10629        | 1080741      | 9.83 (9.65-10.02)                 | 8.49(7.94-9.04)                                         | 1.85 (1.79-1.92)                               | 1.66 (1.60-1.72)                 |
| ≥75                                   | 25505                        | 3809         | 170821       | 22.30 (21.59-23.01)               | 102188                                              | 6764         | 729322       | 9.27 (9.05-9.50)                  | 13.03(12.29-13.77)                                      | 2.36 (2.27-2.45)                               | 1.78 (1.71-1.85)                 |

Abbreviations: CI, confidence interval; HR, hazard ratio; PY, person-years.

<sup>a</sup>per 1,000 person-years

<sup>b</sup>Exact confidence intervals for Poisson distribution

<sup>c</sup>Models were adjusted for sex, age, index year, and comorbidities including hypertension, diabetes, chronic obstructive pulmonary disease, hyperlipidemia, malignancy, heart failure, ischemic heart disease, stroke, and chronic renal insufficiency, and the number of outpatient visits in the year before the index date.

<sup>d</sup>Interaction between sex and varicose veins, p<0.001

<sup>e</sup>Interaction between age and varicose veins, p<0.001

© 2018 American Medical Association. All rights reserved.

(a) Deep vein thrombosis (DVT)

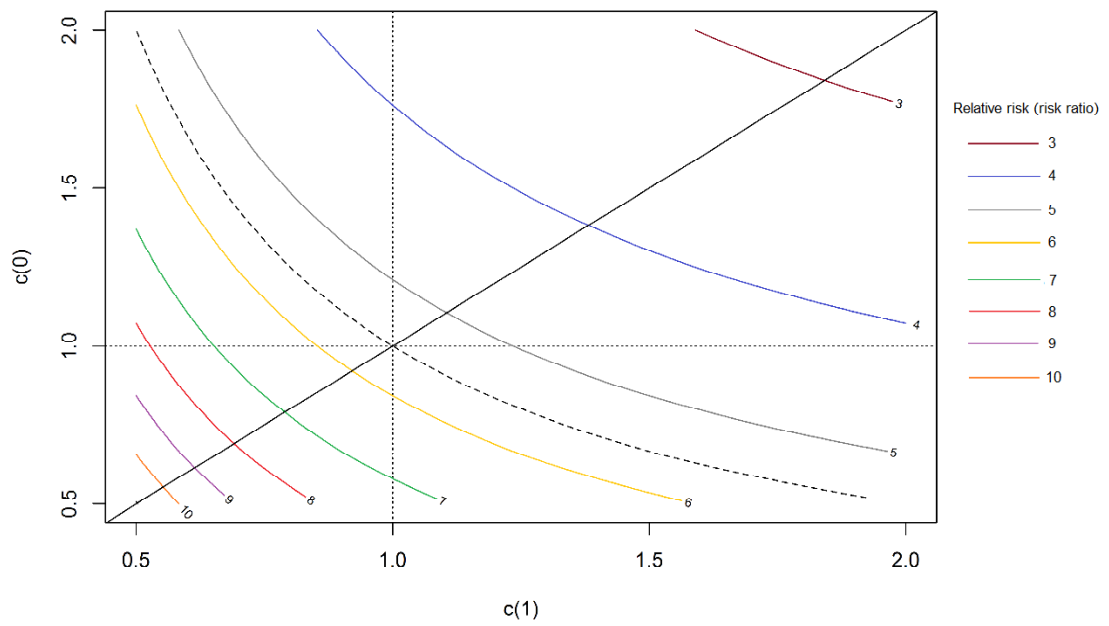

(b) Pulmonary embolism (PE)

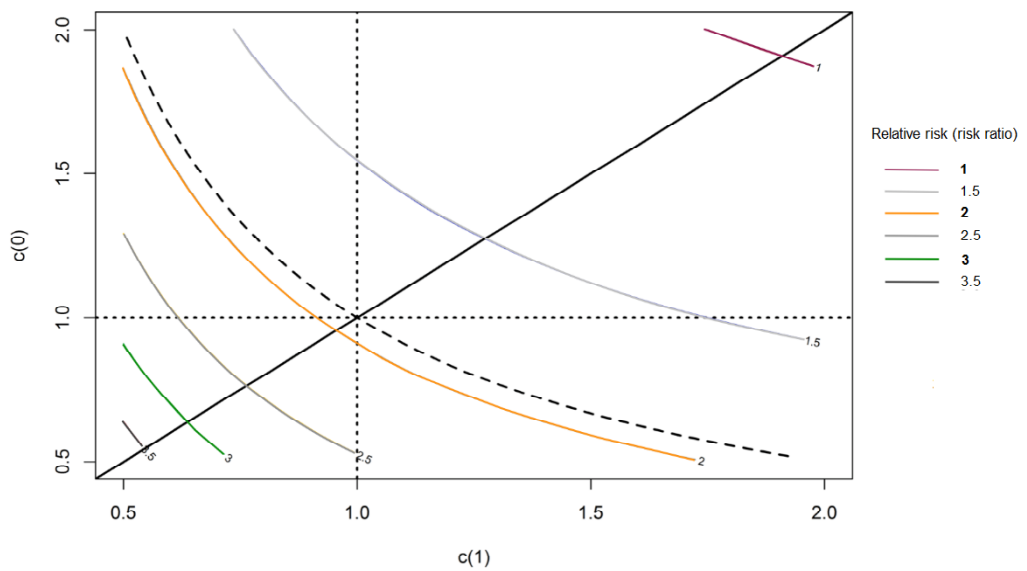

(c) peripheral artery disease (PAD)

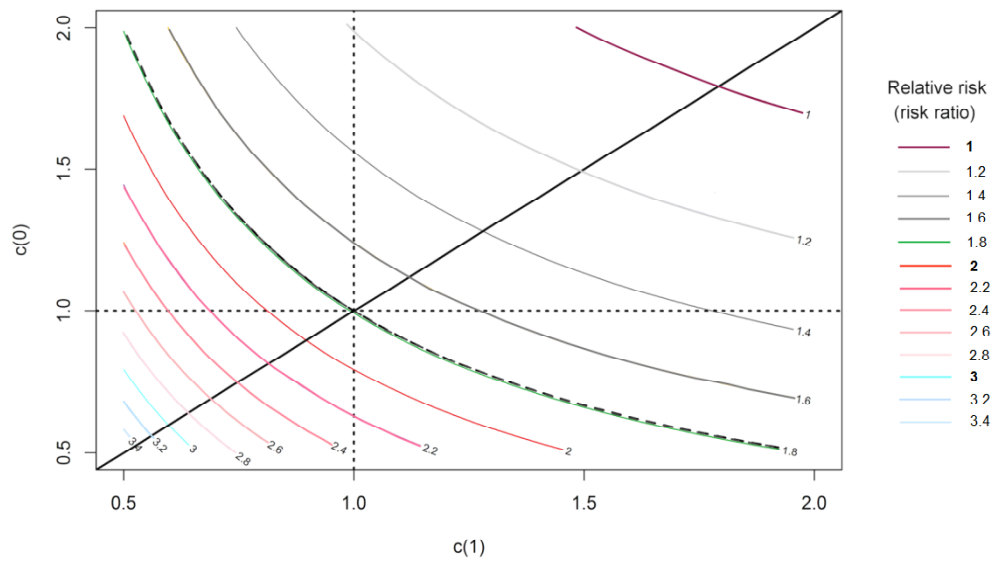

**eFigure.** Sensitivity analysis for the relative risk (RR) of DVT, PE and PAD calculated using inverse probability of treatment weighting (IPTW). The marginal RRs obtained from IPTW were corrected for various values of confounding functions,  $c(0)$  and  $c(1)$ . These parameters are counterfactual, where  $c(1)$  represents a hypothetical RR of the outcome (DVT, PE, or PAD) comparing those who actually did or did not have varicose veins, but assuming all had varicose veins. The values of  $c(0)$  and  $c(1)$  were then varied to estimate the effect of unmeasured confounding required to give an adjusted RR. For example,  $c(0)=c(1)$  denotes the assumption that there were no unmeasured effect modifiers, and  $c(0)>1$  and  $c(1)>1$  implies that the exposed participants would have had a greater risk of the potential outcome than unexposed participants, had they had the same exposure status. The solid straight line indicates  $c(0)=c(1)$ . When  $c(0)=c(1)=1$ , the relative risk unadjusted for unmeasured confounding is (a) 5.52 for deep vein thrombosis; (b) 1.91 for pulmonary embolism, and (3) 1.79 for peripheral artery disease. The dashed curve indicates the value of  $c(0)$  and (1) required to give a relative risk of (a) 5.52 for deep vein thrombosis; (b) 1.91 for pulmonary embolism, and (3) 1.79 for peripheral artery disease.
